# Supplementary material for: TDP-43 mislocalization drives neurofilament changes in a novel model of TDP-43 proteinopathy
Source: PubMed Central journal article supplement (PMC7888715; doi:10.1242/dmm.047548), 2021-02-11
Supplement: dmm-14-047548-s1.pdf [file dmm-14-047548-s1.pdf]

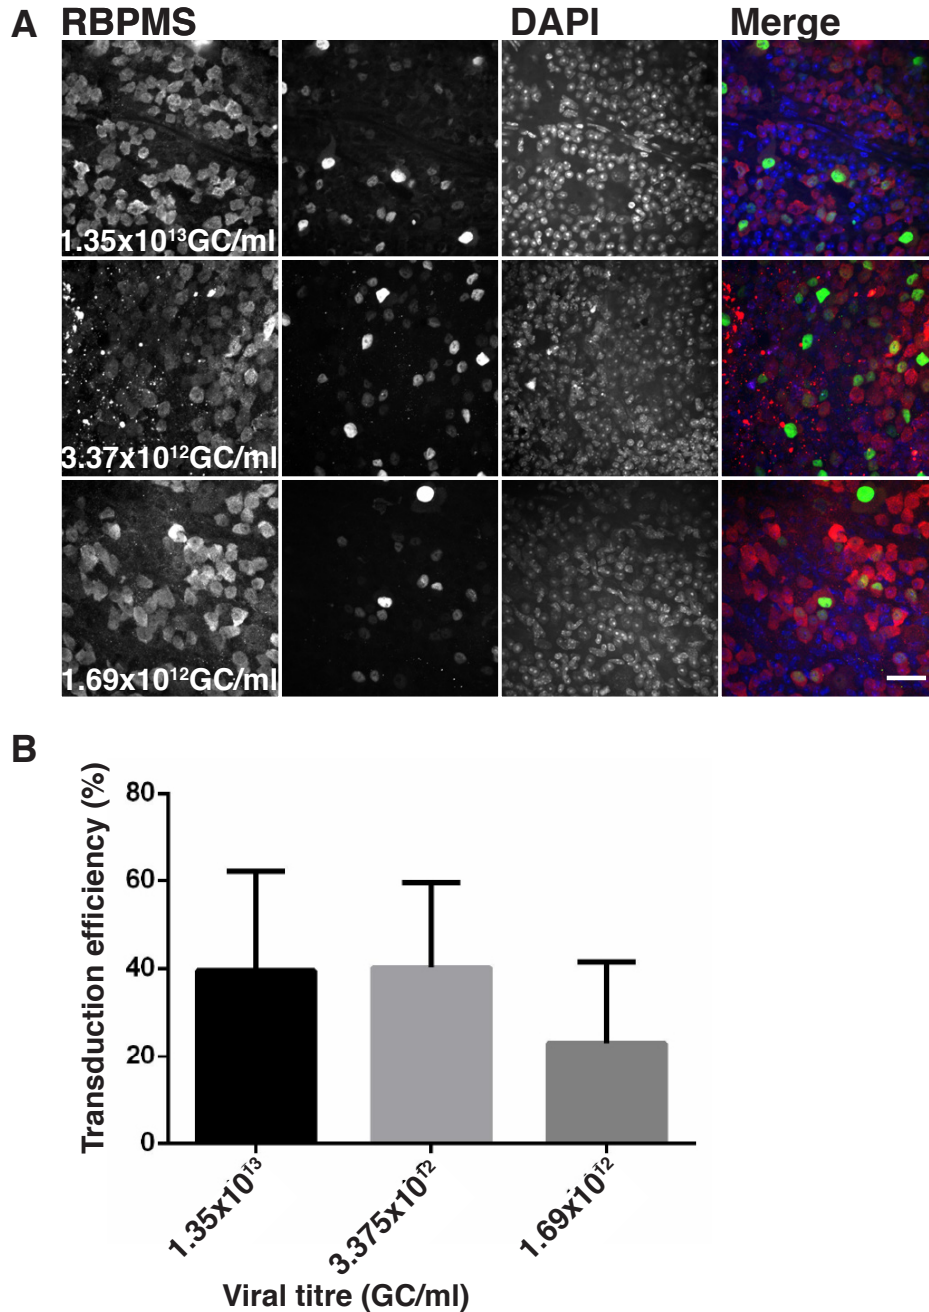

**Fig. S1. Optimization of RGC transduction with TDP-WT-GFP.** (A) Wholemout retina from mice injected with hTDP-WT-GFP at different concentrations, immunolabelled for RBPMs (red) GFP (green), and stained with DAPI (blue). (B) The percentage of co-localising GFP and RBPMs RGC bodies were quantified to provide an estimate of viral transduction efficiency for each concentration. Results are mean and SEM. Scale bar  $20\mu\text{m}$ .

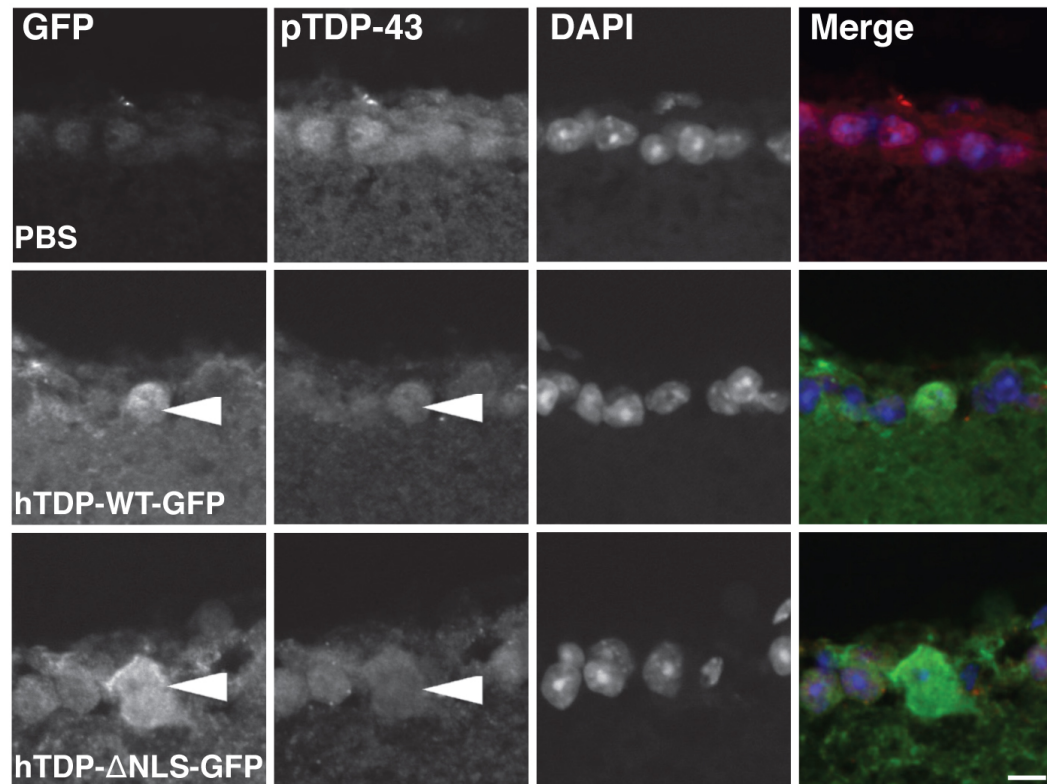

**Fig. S2. Phosphorylated TDP-43 in cross-sectioned retina.** Cross-sectioned retinas from mice injected with PBS vehicle, hTDP-WT-GFP, hTDP-ΔNLS-GFP immunolabelled for phosphorylated TDP-43 (at residues serine 409/410, red), GFP (green) and stained with DAPI (blue), showing minimal phosphorylated TDP-43 labelling GFP-positive cells (arrowheads) or in other cells in the RGC layer. Scale bar 20 $\mu$ m.

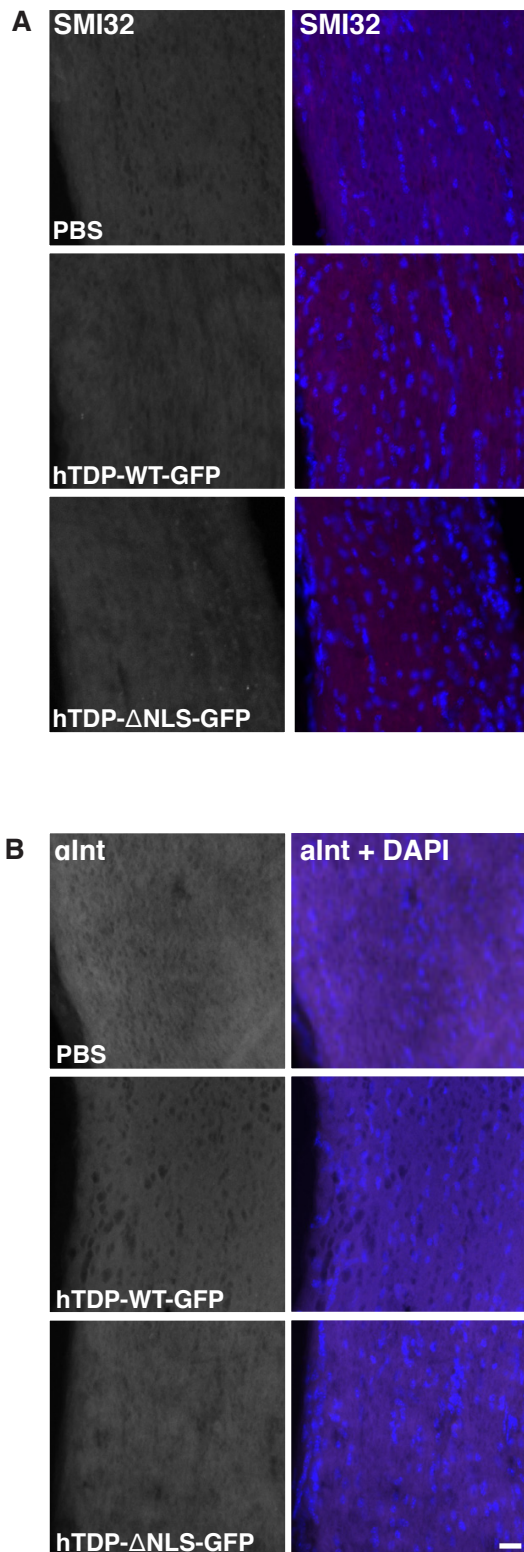

**Fig. S3. SMI32 and alpha internexin immunolabelling in longitudinal optic nerve sections.** Longitudinally sectioned optic nerves from mice injected with PBS vehicle, hTDP-WT-GFP, hTDP- $\Delta$ NLS-GFP. (A) Tissue immunolabelled for SMI32 (red) and stained with DAPI (blue), showing absence of SMI32-positive labelling, and similarly distributed NFH-labelling. (B) Tissue immunolabelled for alpha internexin (red) and stained with DAPI (blue), showing absence of alpha internexin-positive labelling. Scale bar 20 $\mu$ m.
